# Supplementary material
Source: MDPI journal article supplement (https://www.mdpi.com/2227-9717/8/4/454)
Supplement: s1 [file s1]

# Techno-economic assessment of cell-free synthesis of monoclonal antibodies using CHO cell extracts

Vaishali Thaore, Dimitris Tsourapas, Nilay Shah, Cleo Kontoravdi

Centre for Process Systems Engineering, Department of Chemical Engineering,  
Imperial College London, London SW7 2AZ, UK

**Table S1:** CFPS medium components

| Component                     | Concentration in mixture | *Bulk price (US \$/kg) | Source                      |
|-------------------------------|--------------------------|------------------------|-----------------------------|
| HEPES KOH, pH 7.6             | 30 mM                    | 113.60                 | Sigma-Aldrich <sup>1</sup>  |
| Potassium acetate             | 150 mM                   | 11.50                  | Sigma-Aldrich <sup>2</sup>  |
| Magnesium acetate             | 25.9 mM                  | 16.68                  | Sigma-Aldrich <sup>3</sup>  |
| ATP                           | 1.75 mM                  | 200.00                 | Carbosynth <sup>4</sup>     |
| CTP                           | 0.3 mM                   | 2900.00                | Carbosynth <sup>5</sup>     |
| GTP                           | 0.3 mM                   | 59393.72               | Sigma-Aldrich <sup>6</sup>  |
| UTP                           | 0.3 mM                   | 778.00                 | Carbosynth <sup>7</sup>     |
| Amino acids                   | 100 µM                   | 34.29                  | Sigma-Aldrich <sup>8</sup>  |
| <sup>14</sup> C Leucine       | 9.9 dpm/pmol             | 68.90                  | Sigma-Aldrich <sup>9</sup>  |
| Sodium azide                  | 0.02%                    | 18.36                  | Sigma-Aldrich <sup>10</sup> |
| Caspase inhibitor Ac-DEVD-CMK | 30 µM                    | 7100.00                | Sigma-Aldrich <sup>11</sup> |
| DTT                           | 2.5 mM                   | 1588.00                | Sigma-Aldrich <sup>12</sup> |

\*All raw material price was considered as 10% of the market selling price

## S2. Analysis of monoclonal antibody demand<sup>13</sup>

The monoclonal antibody for lung cancer patient in the United Kingdom

- In 2011, there were 141,000 patients with lung cancer in the United Kingdom<sup>14</sup>
- Only 80–85% of lung cancer patients have non-small cell lung cancer<sup>15</sup>
- Approximately 75% of patients of non-small cell lung cancer have non-squamous non-small cell lung cancer.
- Only 40 % of non-squamous non-small cell lung cancer patients are in the stage that can be treated by Avastin.
- Five percent market penetration capacity of Avastin for treating lung cancer patients in the United Kingdom.
- Assume a dose size of 15.5 g per person per year.

$$\begin{aligned}\text{Amount of mAb required} &= 141000 \times 0.85 \times 0.75 \times 0.40 \times 0.05 \times 15.5 \\ &= 27865 \text{ g per year} \cong 28 \text{ kg/year}\end{aligned}$$

### Reference:

Web-source for raw material prices

1. HEPES KOH:  
<https://www.sigmaaldrich.com/catalog/product/sigma/h0527?lang=en&region=US>, accessed in June 2019
2. Potassium acetate:  
<https://www.sigmaaldrich.com/catalog/product/sigma/p1190?lang=en&region=US>, accessed in June 2019
3. Magnesium acetate:  
<https://www.sigmaaldrich.com/catalog/product/sigma/p1190?lang=en&region=US>, accessed in June 2019
4. ATP,  
<https://www.carbosynth.com/Carbosynth/Catalogs.nsf/0/631BEFB11CAE17B380>

- 257E29004F2B8E/\$FILE/Carbosynth\_Nucleoside\_and\_Phosphoramidite\_Catalogue.pdf, accessed in June 2019
5. CTP:  
[https://www.carbosynth.com/Carbosynth/Catalogs.nsf/0/631BEFB11CAE17B380257E29004F2B8E/\\$FILE/Carbosynth\\_Nucleoside\\_and\\_Phosphoramidite\\_Catalogue.pdf](https://www.carbosynth.com/Carbosynth/Catalogs.nsf/0/631BEFB11CAE17B380257E29004F2B8E/$FILE/Carbosynth_Nucleoside_and_Phosphoramidite_Catalogue.pdf), accessed in June 2019
  6. GTP:  
<https://www.sigmaaldrich.com/catalog/product/sigma/g8877?lang=en&region=US>, accessed in June 2019
  7. UTP:  
[https://www.carbosynth.com/Carbosynth/Catalogs.nsf/0/631BEFB11CAE17B380257E29004F2B8E/\\$FILE/Carbosynth\\_Nucleoside\\_and\\_Phosphoramidite\\_Catalogue.pdf](https://www.carbosynth.com/Carbosynth/Catalogs.nsf/0/631BEFB11CAE17B380257E29004F2B8E/$FILE/Carbosynth_Nucleoside_and_Phosphoramidite_Catalogue.pdf), accessed in June 2019
  8. Amino acids: Mixture of all 20 amino acid  
<https://www.sigmaaldrich.com/catalog/search?term=alanine&interface=All&N=0&mode=match%20partialmax&lang=en&region=US&focus=product>, accessed in June 2019
  9. <sup>14</sup>CLeucine,  
<https://www.sigmaaldrich.com/catalog/product/sigma/l8912?lang=en&region=US>, accessed in June 2019
  10. Sodium azide,  
<https://www.sigmaaldrich.com/catalog/product/sial/s2002?lang=en&region=US>, accessed in June 2019
  11. Caspase inhibitor Ac-DEVD-CMK,  
<https://www.sigmaaldrich.com/catalog/product/mm/218750?lang=en&region=US>, accessed in June 2019
  12. DTT,  
<https://www.sigmaaldrich.com/catalog/product/sial/s2002?lang=en&region=US>, accessed in June 2019

13. P. Bunnak, R. Allmendinger, S. V Ramasamy, P. Lettieri, N.J. Titchener-Hooker, Life-cycle and cost of goods assessment of fed-batch and perfusion-based manufacturing processes for mAbs, *Biotechnol. Prog.* 32 (2016) 1324–1335. doi:10.1002/btpr.2323.
14. British Lung Foundation. Lung Cancer Statistics. Retrieved July 18, 2016. <https://statistics.blf.org.uk/lung-cancer>
15. American Cancer Society. What is non-small cell lung cancer? Retrieved July 18, 2016. <http://www.cancer.org/cancer/lungcancer-non-smallcell/detailedguide/non-small-cell-lung-cancerwhat-is-non-small-cell-lung-cancer>.

**Table S.2:** Process Economic data for large-scale manufacturing via SGE and CFPS  
(200 kg mAb/year)

| Values                                           |                    |  | Cost US \$ (2018) |               |
|--------------------------------------------------|--------------------|--|-------------------|---------------|
| Total Plant Direct Cost (DC)                     |                    |  | <b>SGE</b>        | <b>CFPS</b>   |
| Equipment Purchase Cost                          | PC                 |  | 7.167             | 10.472        |
| Installation                                     | IC                 |  | 3.793             | 4.009         |
| Process Piping                                   | $0.35 \times PC$   |  | 2.508             | 3.665         |
| Instrumentation                                  | $0.40 \times PC$   |  | 2.867             | 4.189         |
| Insulation                                       | $0.03 \times PC$   |  | 0.215             | 0.314         |
| Electrical                                       | $0.10 \times PC$   |  | 0.717             | 1.050         |
| Buildings                                        | $0.45 \times PC$   |  | 3.225             | 4.710         |
| Yard Improvement                                 | $0.15 \times PC$   |  | 1.075             | 1.570         |
| Auxiliary Facilities                             | $0.40 \times PC$   |  | 2.867             | 4.190         |
| DC                                               |                    |  | 24.433            | 34.20         |
|                                                  |                    |  |                   |               |
| Engineering                                      | $0.25 \times TPDC$ |  | 6.108             | 8.552         |
| Construction                                     | $0.35 \times TPDC$ |  | 8.551             | 11.959        |
| Total Plant Indirect Cost (IC)                   |                    |  | 14.660            | 20.501        |
|                                                  |                    |  |                   |               |
| <b>Total Plant Cost (TPC = TPDC+TPIC)</b>        |                    |  | <b>39.093</b>     | <b>54.67</b>  |
|                                                  |                    |  |                   |               |
| <b>Contractor's Fee &amp; Contingency (CFC)</b>  |                    |  |                   |               |
| Contractor's Fee                                 | $0.05 \times TPC$  |  | 1.955             | 2.773         |
| Contingency                                      | $0.1 \times TPC$   |  | 3.909             | 5.467         |
| CFC                                              |                    |  | 5.864             | 8.200         |
| <b>Direct Fixed Capital Cost (DFC = TPC+CFC)</b> |                    |  | <b>44.56</b>      | <b>62.87</b>  |
|                                                  |                    |  |                   |               |
| <b>Working Capital</b>                           |                    |  |                   |               |
| 30 days of labour                                |                    |  | 0.36              | 0.56          |
| 30 days of Raw Material                          |                    |  | 0.09              | 47.26         |
| 30 days of Utilities                             |                    |  | 0.0013            | 0.01          |
| <b>Working Capital</b>                           |                    |  | <b>0.46</b>       | <b>47.83</b>  |
| <b>Start-up</b>                                  | $0.05 \times DFC$  |  | <b>2.25</b>       | <b>3.14</b>   |
|                                                  |                    |  |                   |               |
| <b>TC =DFC + Working Capital + Start-up</b>      |                    |  | <b>47.67</b>      | <b>113.85</b> |

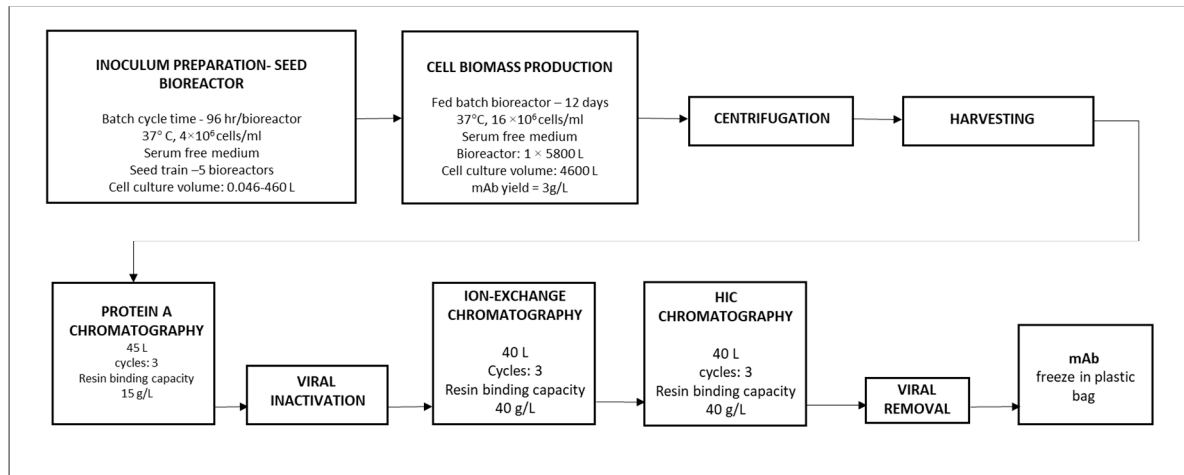

(a)

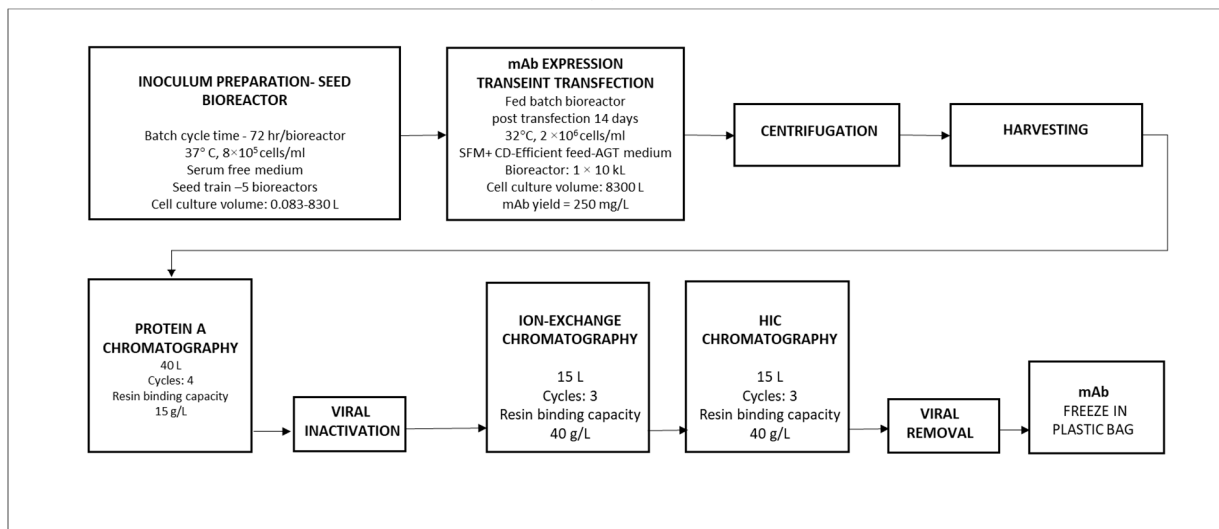

(b)

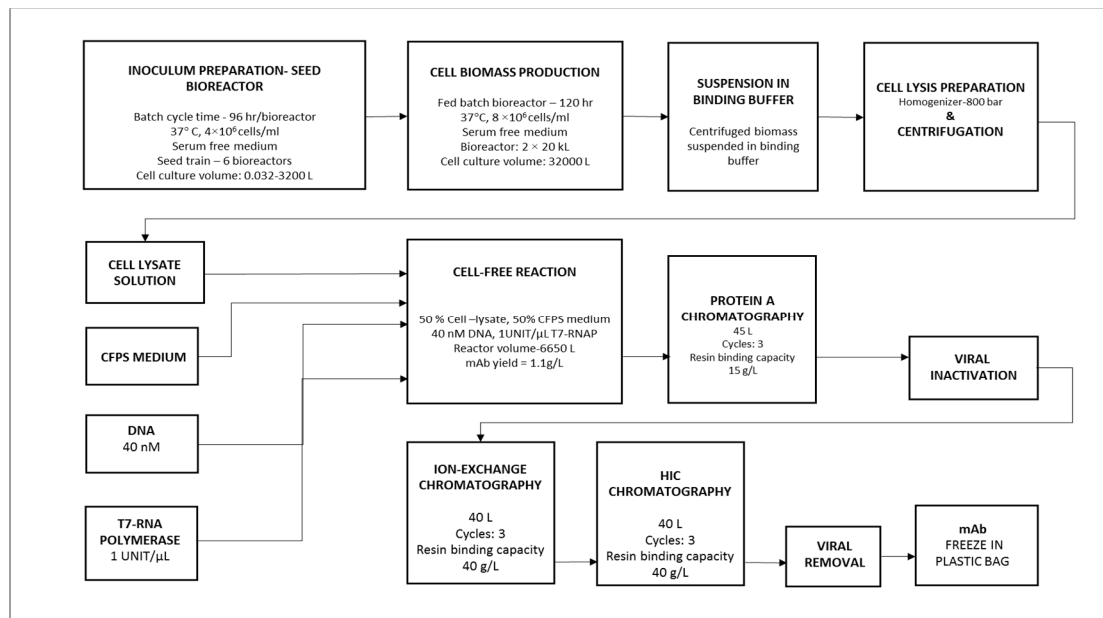

(c)

Figure S1: Schematic process block diagrams for mAb production by: (a) SGE (b) TGE and (c) CFPS.

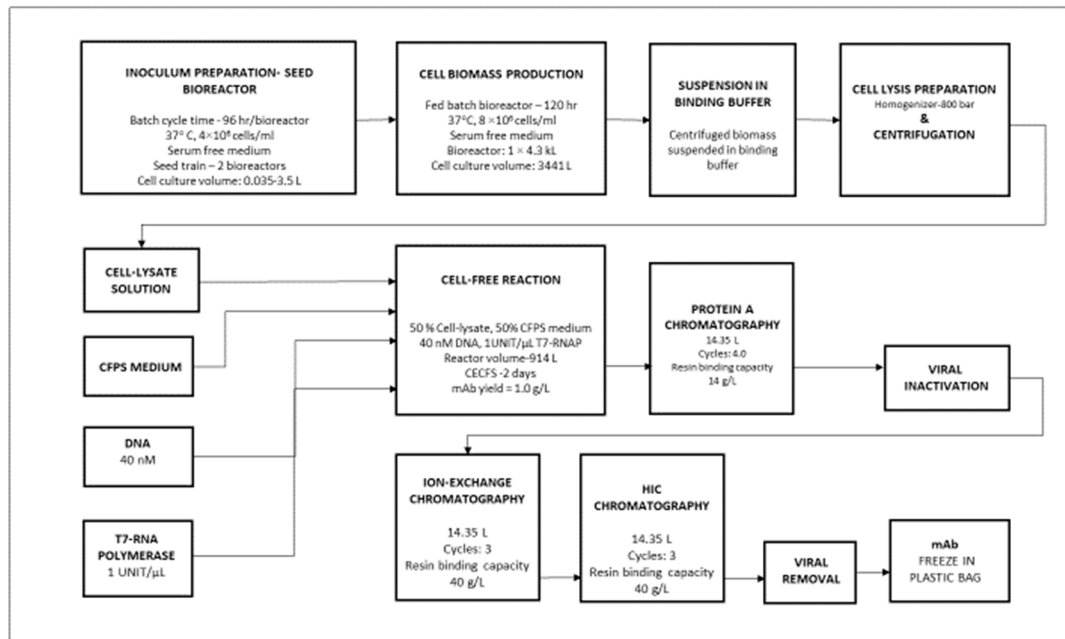

Figure S2: Schematic process block diagrams for mAb production 25kg/year by: (a) CFPS.

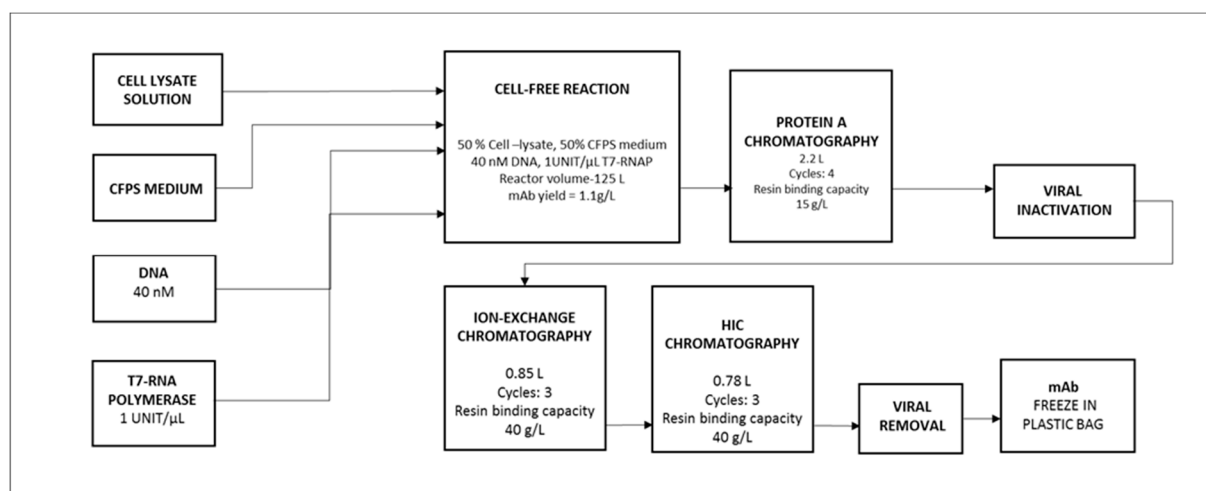

Figure S3: Process flow for personalised medicine manufacturing process

**Table S3:** The operating cost per batch of 1L CFPS reaction volume

| <b>Operating cost/batch</b>                                          | <b>Cost, \$</b><br>(without DNA recycle,<br>T7-RNAP,<br>6.9 \$/5000<br>UNITs) | <b>Cost, \$</b><br>(with DNA Recycle,<br>T7-RNAP,<br>6.9 \$/5000<br>UNITs) | <b>Cost, \$</b><br>(with 80% DNA recovered<br>T7-RNAP,<br>6.9 \$/5000<br>UNITs) | <b>Cost, \$</b><br>(with DNA recycle,<br>T7-RNAP,<br>2.0 \$/5000<br>UNITs) | <b>Cost, \$</b><br>(with 80% DNA recovered<br>T7-RNAP,<br>2.0 \$/5000<br>UNITs) |
|----------------------------------------------------------------------|-------------------------------------------------------------------------------|----------------------------------------------------------------------------|---------------------------------------------------------------------------------|----------------------------------------------------------------------------|---------------------------------------------------------------------------------|
| Raw Materials                                                        | 2445                                                                          | 1845                                                                       | 1965                                                                            | 874                                                                        | 994                                                                             |
| Facility Dependent                                                   | 26248                                                                         | 26248                                                                      | 26248                                                                           | 26248                                                                      | 26248                                                                           |
| Labour-Dependent                                                     | 23318                                                                         | 23318                                                                      | 23318                                                                           | 23318                                                                      | 23318                                                                           |
| Consumables                                                          | 7012                                                                          | 7012                                                                       | 7012                                                                            | 7012                                                                       | 7012                                                                            |
| Utilities                                                            | 7                                                                             | 7                                                                          | 7                                                                               | 7                                                                          | 7                                                                               |
| Waste Treatment/Disposal                                             | 333                                                                           | 333                                                                        | 333                                                                             | 333                                                                        | 333                                                                             |
| Total operating cost/batch                                           | 59363                                                                         | 58763                                                                      | 58883                                                                           | 57792                                                                      | 57912                                                                           |
| Redefined operating cost (without Facility dependent cost), \$/batch | 33115                                                                         | 32515                                                                      | 32635                                                                           | 31544                                                                      | 31664                                                                           |
| The mAb production cost, \$/mg                                       | 43                                                                            | 42.27                                                                      | 42.38                                                                           | 40.96                                                                      | 41.12                                                                           |

For the assumed mAb demand of 20 g/person/year, mAb COG was estimated as below.

- Total 26 number of batches are required to produce 20 g/year
- For 1 L CFPS reaction volume, mAb produced per batch = 770 mg
- Here mAb COG is defined as Raw material cost per batch

Therefore, from TableS3,

mAb COG per batch = \$2445, producing 770 mg mAb/batch

Thus, mAb COG was estimated for the assumed mAb demand for one person over year (mAb demand = 20 g/person/year) = \$63,506/person/year. Figure S4 shows the mAb COG with recycling DNA and with considering 80 to 60% DNA recovery.



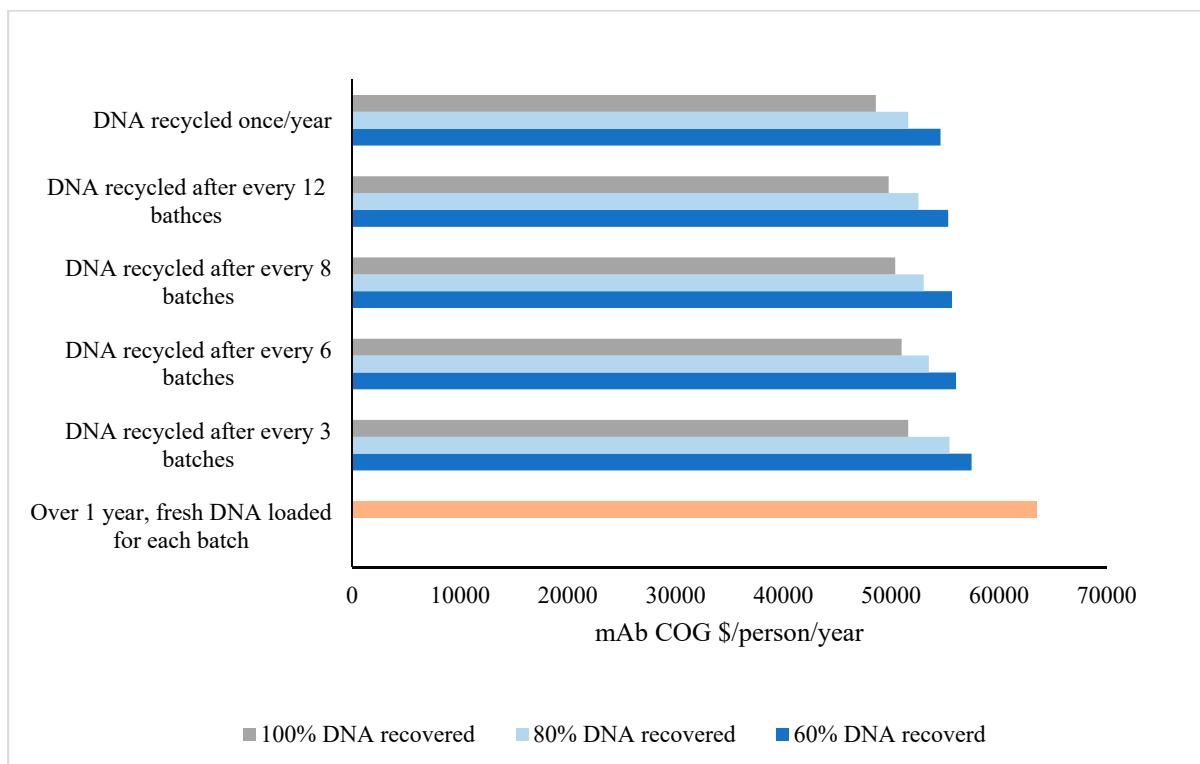

Figure S4: The effect of DNA recovery on mAb COG, \$/person/year for the assumed mAb demand as 20 g mAb/person/year. (mAb COG =Raw material cost)
